# Supplementary material for: CuS nanotubes for ultrasensitive nonenzymatic glucose sensors
Source: Royal Society of Chemistry journal article supplement (doi:10.1039/b814725f), 2008-01-01
Supplement: b814725f.pdf [file b814725f.pdf]

## Supporting information

### CuS Nanotube for Ultrasensitive Nonenzymatic Glucose Sensors

Xiaojun Zhang\*<sup>1,2</sup>, Guangfeng Wang<sup>1,3</sup>, Yan Wei<sup>1,3</sup>, Bin Fang<sup>1,3</sup>

1. College of Chemistry and Materials Science, Anhui Normal University, Wuhu 241000, P.R. China

2. Anhui Key Laboratory of Functional Molecular Solids, Anhui Normal University, Wuhu 241000, P.R. China

3. Anhui Key Laboratory of Chem-Biosensing, Anhui Normal University, Wuhu 241000, P.R. China

E-mail: zhangxiaojun173@yahoo.com.cn

### Experimental Procedures

**Chemicals.**  $\text{Cu}(\text{NO}_3)_2 \cdot 3\text{H}_2\text{O}$ , oleic acid, sodium thiosulfate, poly(vinylpyrrolidone) (PVP), ethanol, and  $\text{K}_3[\text{Fe}(\text{CN})_6]$  were purchased from Shanghai Chemical Corp, and D(+)-glucose (97%) and Nafion (5 wt %) were purchased from Sigma-Aldrich. All chemicals were used as received without any further purification. Distilled water was used in all experiments.

**Synthetic Procedures.** In a typical synthesis process, 0.24 g of copper nitrate, 0.3 g sodium thiosulfate and 0.2 g of poly(vinylpyrrolidone) were mixed with distilled water, and then the oleic acid was added. The mixture was stirred vigorously to homogeneity and then transferred into a 60 mL steel autoclave. The autoclave was sealed, maintained at 150 °C for 12 h, and then cooled naturally to room temperature. The product was washed with distilled water and ethanol several times to remove impurities before characterization.

**Electrochemical Measurements.** The modified electrode was prepared as follows: GC electrodes (3 mm diameter) were carefully polished with a diamond pad/3  $\mu\text{m}$  polishing suspension, rinsed with distilled water and ethanol, and then dried under ambient nitrogen gas. CuS nanotubes (10 mg) were dissolved in a mixture of 0.1 mL of Nafion perfluorosulfonated ion-exchange resin and 0.9 mL of distilled water. Approximately 60 min of ultrasonication was necessary to obtain uniformly dispersed CuS nanotubes. After

dropping 10  $\mu\text{L}$  of the CuS nanotubes solution onto the electrode surface, the electrode was dried in air. Electrochemical measurements were performed on a model CHI660B electrochemical analyzer (ChenHua Instruments Co. Ltd., Shanghai, China) controlled by a personal computer. Using the modified GC working electrode, the CV and CA data were measured in a mixture of 1  $\text{mmol L}^{-1}$  glucose and 20  $\text{mmol L}^{-1}$  phosphate buffer solution (PBS, pH 9.2). The CA measurements required operation of the electrode at a constant applied potential of 0.20 V versus SCE. Once the current reached a baseline in the absence of glucose, glucose was added every 40 s thereafter. The CV and CA measurements were carried out in 50  $\text{mmol L}^{-1}$  PBS (pH 9.2).

**Characterization.** XRD patterns of the products were recorded on a Shimadzu XRD-6000 X-ray diffractometer at a scanning rate of  $0.05^\circ/\text{s}$  with a  $2\theta$  range from 10 to  $80^\circ$ , with high-intensity Cu  $K\alpha$  radiation ( $\lambda = 0.154178 \text{ nm}$ ). Field emission scanning electron microscopes and energy dispersive X-ray analyses were obtained using a JEOL JSM-6700 FESEM (operating at 10 kV). The HRTEM analysis used a JEOL 2010 instrument with an accelerating voltage of 200 kV.

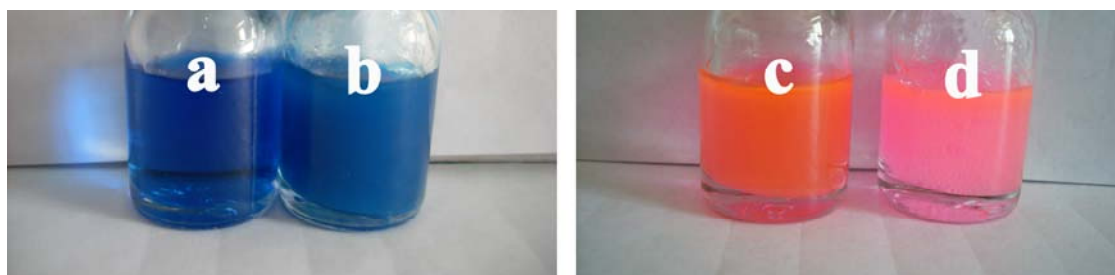

**Figure S1.** Methylene blue (Water-solubility dye) in water (a), O/W microemulsion (b); Sudan III (Oil-solubility dye) in oleic acid (c), O/W microemulsion (d).

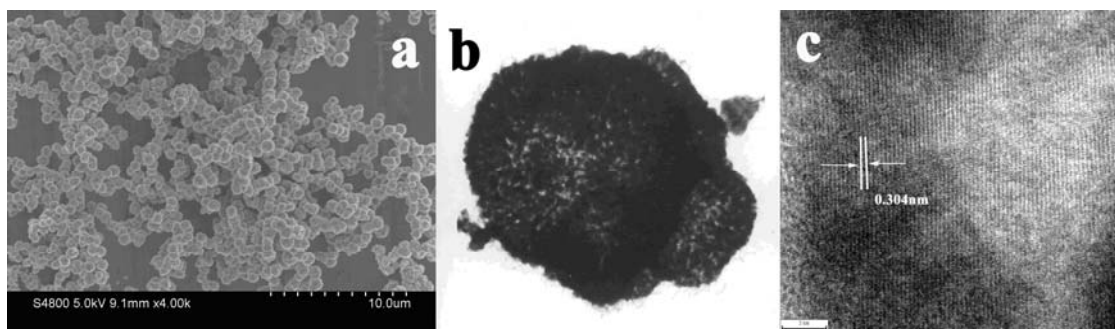

**Figure S2.** (a) SEM image of the hollow CuS nanospheres, (b) TEM image of the single hollow CuS nanospheres, (c) HRTEM image of the hollow CuS nanospheres.

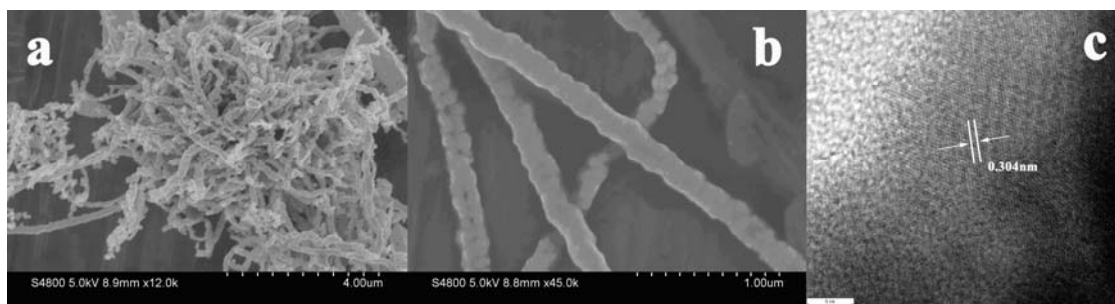

**Figure S3.** (a) Low magnified and (b) high magnified FESEM images of the CuS nanotubes, (c) HRTEM image of the nanotube.

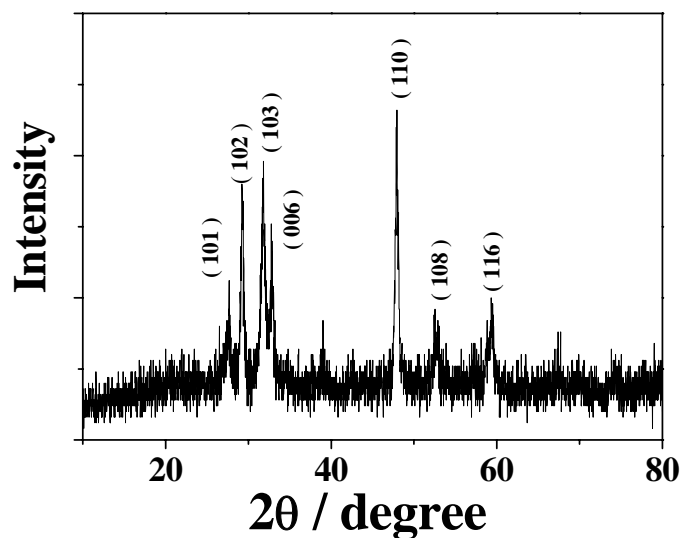

**Figure S4.** XRD pattern of the as-prepared products showing hexagonal phase of CuS nanotubes.

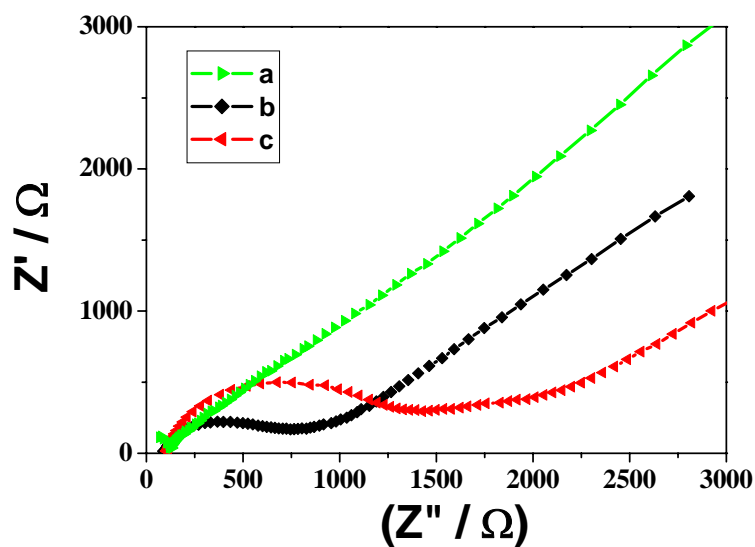

**Figure S5.** The electrochemical impedance spectroscopy of: (a) bare GC electrode; (b) CuS nanotube made up of CuS nanoparticles; (c) regular CuS nanotube modified GC electrode in  $2.5 \times 10^{-3} \text{ mol L}^{-1} [\text{Fe}(\text{CN})_6]^{4-/3-} + 0.1 \text{ mol L}^{-1} \text{ KCl} + 10 \times 10^{-3} \text{ mol L}^{-1} \text{ PBS}$  (pH = 7.2) at a bias potential of 0.20 V.

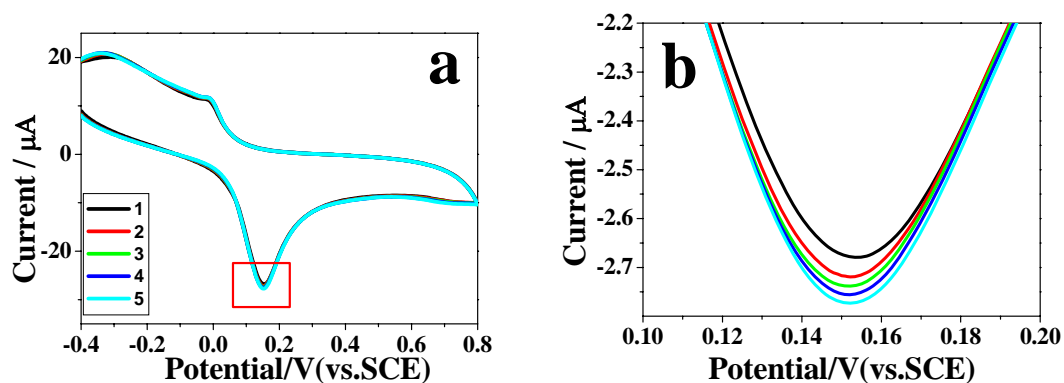

**Figure S6.** (a) CV performance of regular CuS nanotube/Nafion-modified GC electrodes in the presence of the same amount of the glucose in  $50 \text{ mmol L}^{-1}$  PBS (pH 9.2) at a scan rate of  $50 \text{ mV s}^{-1}$ . (1-5 means 1, 2, 3, 4, 5  $\mu\text{mol L}^{-1}$  glucose in  $50 \text{ mmol L}^{-1}$  PBS, respectively) (b) the enlargement of the peak part in a.

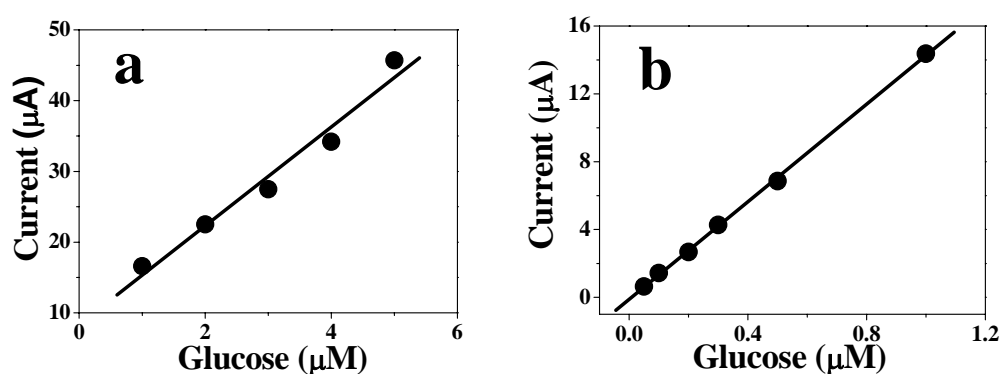

**Figure S7.** Linear response for glucose concentrations between (a) 1  $\mu\text{mol L}^{-1}$  and 5  $\mu\text{mol L}^{-1}$ ; (b) 0.05  $\mu\text{mol L}^{-1}$  and 1  $\mu\text{mol L}^{-1}$

| Glucose ( $\mu\text{M}$ ) | Current ( $\mu\text{A}$ ) |       |       | Average Current $\pm$ SD ( $\mu\text{A}$ ) |
|---------------------------|---------------------------|-------|-------|--------------------------------------------|
|                           | 1                         | 2     | 3     |                                            |
| 1                         | 15.51                     | 16.07 | 15.27 | 15.61 $\pm$ 0.4106                         |
| 2                         | 22.08                     | 22.84 | 22.65 | 22.52 $\pm$ 0.3955                         |
| 3                         | 27.78                     | 27.18 | 27.46 | 27.47 $\pm$ 0.3002                         |
| 4                         | 34.40                     | 34.18 | 33.97 | 34.18 $\pm$ 0.2151                         |
| 5                         | 45.67                     | 45.99 | 45.37 | 45.68 $\pm$ 0.3101                         |

**Table S1** Glucose concentration (between 1  $\mu\text{mol L}^{-1}$  and 5  $\mu\text{mol L}^{-1}$ ) influence to Average Current  $\pm$  standard deviation (SD) determined by CV.

| Glucose ( $\mu\text{M}$ ) | Current ( $\mu\text{A}$ ) |        |        | Average Current $\pm$ SD ( $\mu\text{A}$ ) |
|---------------------------|---------------------------|--------|--------|--------------------------------------------|
| 0.05                      | 0.6406                    | 0.6570 | 0.6372 | 0.6449 $\pm$ 0.01059                       |
| 0.1                       | 1.429                     | 1.422  | 1.443  | 1.431 $\pm$ 0.01061                        |
| 0.2                       | 2.676                     | 2.622  | 2.714  | 2.671 $\pm$ 0.04623                        |
| 0.3                       | 4.144                     | 4.228  | 4.428  | 4.267 $\pm$ 0.1459                         |
| 0.5                       | 6.858                     | 6.982  | 6.715  | 6.852 $\pm$ 0.1336                         |
| 1                         | 14.50                     | 14.37  | 14.19  | 14.35 $\pm$ 0.1557                         |

**Table S2** Glucose concentration (between 0.05  $\mu\text{mol L}^{-1}$  and 1  $\mu\text{mol L}^{-1}$ ) influence to Average Current  $\pm$  standard deviation (SD) determined by CV.
